# Supplementary material
Source: MDPI journal article supplement (https://www.mdpi.com/2072-4292/13/6/1209)
Supplement: s1 [file s1]

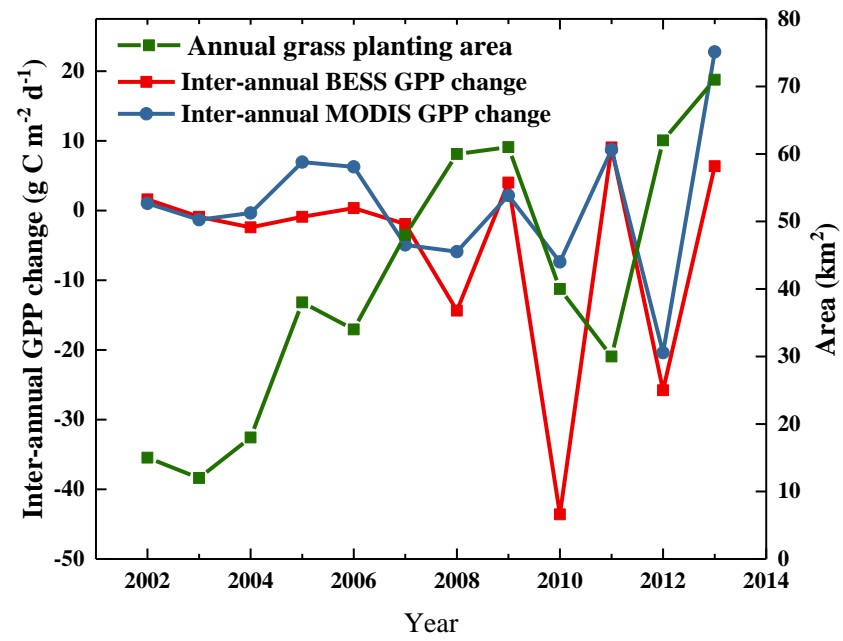

**Figure S1.** Comparison of annual grass planting area and inter-annual GPP change caused by grass planting 2001–2015.
